# Supplementary material
Source: PubMed Central journal article supplement (PMC4120815)
Supplement: Supp_Fig1.pdf [file Supp_Fig1.pdf]

## Supplementary Data

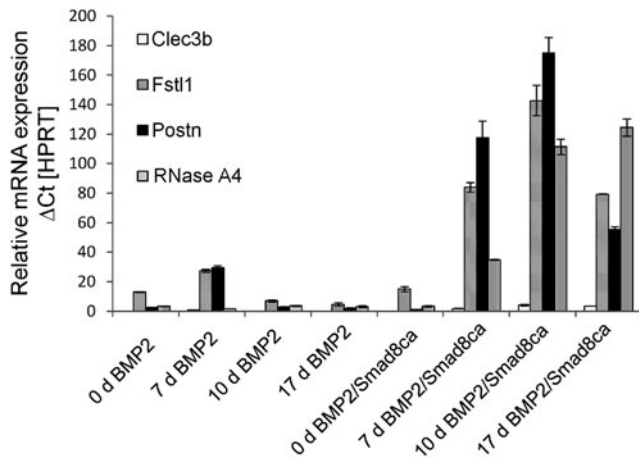

**SUPPLEMENTARY FIG. S1.** Quantitative real-time polymerase chain reaction analyses for the cell lines C3H10T $\frac{1}{2}$ -BMP2 and BMP2/Smad8ca at all four time points.  $\Delta$ Ct values (using the housekeeping gene HPRT as a reference) are plotted. The same mRNA preparations as used for the microarrays were used for these assays. BMP, bone morphogenetic protein; HPRT, hypoxanthine phosphoribosyl transferase.
